# Supplementary material for: Identification of Prognostic Biomarkers of Potential Hub Genes in Urothelial Carcinoma and Function in Microenvironment
Source: Research Square preprint supplement (doi:10.21203/rs.3.rs-502631/v3), 2021-08-26
Supplement: Supplementary file 1 [file 0b4fa41969f6b1a5cbb35c38.xls]

## Sheet: GSE32548
EntrezID	logFC	ABSLOGFC	AveExpr	t	P.Value	adj.P.Val	B	Symbols	Name
55118	-2.5991	2.5991	8.3135	-5.4325	2.64e-07	1.63e-05	6.6002	CRTAC1	cartilage acidic protein 1
3158	-2.1077	2.1077	10.98	-5.3454	3.92e-07	2.12e-05	6.2262	HMGCS2	3-hydroxy-3-methylglutaryl-CoA synthase 2
6690	-2.0374	2.0374	12.216	-4.5611	1.16e-05	0.00023522	3.0405	SPINK1	serine peptidase inhibitor Kazal type 1
11199	-2.0367	2.0367	8.8932	-3.8934	0.00015719	0.0016749	0.61792	ANXA10	annexin A10
118663	-2.0149	2.0149	9.4491	-4.8216	3.91e-06	0.00011136	4.0604	BTBD16	BTB domain containing 16
387695	-1.9809	1.9809	8.9877	-5.4021	3.03e-07	1.8e-05	6.4694	C10orf99	chromosome 10 open reading frame 99
10202	-1.8701	1.8701	10.608	-5.9238	2.65e-08	3.45e-06	8.7767	DHRS2	dehydrogenase/reductase 2
22802	-1.689	1.689	8.6611	-3.9888	0.00011022	0.0012801	0.94603	CLCA4	chloride channel accessory 4
2877	-1.6787	1.6787	11.238	-4.8845	2.99e-06	9.21e-05	4.3128	GPX2	glutathione peroxidase 2
1577	-1.6399	1.6399	9.1172	-5.6701	8.8e-08	7.49e-06	7.6388	CYP3A5	cytochrome P450 family 3 subfamily A member 5
23584	-1.6145	1.6145	10.668	-6.34	3.48e-09	9.19e-07	10.702	VSIG2	V-set and immunoglobulin domain containing 2
3248	-1.5663	1.5663	10.341	-4.9769	2.01e-06	6.91e-05	4.6871	HPGD	15-hydroxyprostaglandin dehydrogenase
8537	-1.5139	1.5139	8.4194	-6.3498	3.31e-09	9.09e-07	10.749	BCAS1	breast carcinoma amplified sequence 1
644151	-1.4788	1.4788	7.1947	-4.9734	2.04e-06	6.97e-05	4.6728	644151	NA
8000	-1.4675	1.4675	10.202	-3.7773	0.00024022	0.0022896	0.22694	PSCA	prostate stem cell antigen
54997	-1.4449	1.4449	8.7912	-4.3317	2.93e-05	0.00046877	2.1761	TESC	tescalcin
7832	-1.4077	1.4077	9.5609	-7.1371	5.98e-11	6.72e-08	14.567	BTG2	BTG anti-proliferation factor 2
644844	-1.3953	1.3953	7.218	-3.9655	0.00012027	0.0013703	0.86531	PHGR1	"proline, histidine and glycine rich 1"
1510	-1.3922	1.3922	7.3816	-4.2511	4.03e-05	0.0005957	1.88	CTSE	cathepsin E
5320	-1.3575	1.3575	7.7328	-3.2694	0.0013792	0.0086978	-1.37	PLA2G2A	phospholipase A2 group IIA
11045	-1.351	1.351	11.249	-3.2547	0.0014468	0.0090257	-1.4133	UPK1A	uroplakin 1A
66002	-1.3473	1.3473	8.9385	-5.1613	8.94e-07	3.91e-05	5.4485	CYP4F12	cytochrome P450 family 4 subfamily F member 12
84290	-1.3317	1.3317	7.7401	-4.2045	4.83e-05	0.00068971	1.7107	CAPNS2	calpain small subunit 2
80117	-1.3104	1.3104	7.6805	-5.4221	2.77e-07	1.69e-05	6.5553	ARL14	ADP ribosylation factor like GTPase 14
2354	-1.2618	1.2618	11.927	-4.2098	4.73e-05	0.00067813	1.7302	FOSB	"FosB proto-oncogene, AP-1 transcription factor subunit"
2172	-1.259	1.259	7.4285	-5.4057	2.98e-07	1.79e-05	6.4849	FABP6	fatty acid binding protein 6
3397	-1.2544	1.2544	10.403	-5.8458	3.84e-08	4.28e-06	8.424	ID1	"inhibitor of DNA binding 1, HLH protein"
126410	-1.2518	1.2518	7.9764	-4.568	1.13e-05	0.00023192	3.067	CYP4F22	cytochrome P450 family 4 subfamily F member 22
1573	-1.2508	1.2508	9.8483	-4.9391	2.36e-06	7.89e-05	4.5334	CYP2J2	cytochrome P450 family 2 subfamily J member 2
150696	-1.2421	1.2421	10.63	-5.8494	3.77e-08	4.28e-06	8.44	PROM2	prominin 2
169166	-1.2363	1.2363	8.992	-4.5844	1.06e-05	0.00022168	3.1302	SNX31	sorting nexin 31
7379	-1.2265	1.2265	9.0145	-3.7164	0.00029904	0.0027108	0.025444	UPK2	uroplakin 2
3399	-1.1999	1.1999	10.963	-6.1895	7.3e-09	1.45e-06	9.9983	ID3	"inhibitor of DNA binding 3, HLH protein"
147798	-1.1878	1.1878	8.199	-8.2748	1.33e-13	1.19e-09	20.391	TMC4	transmembrane channel like 4
4477	-1.1724	1.1724	6.9981	-3.4214	0.00083301	0.0059439	-0.91202	MSMB	microseminoprotein beta
10840	-1.1627	1.1627	7.6671	-3.3914	0.00092148	0.006423	-1.0039	ALDH1L1	aldehyde dehydrogenase 1 family member L1
7136	-1.1616	1.1616	7.5134	-3.2876	0.0012995	0.008327	-1.3161	TNNI2	"troponin I2, fast skeletal type"
8626	-1.1262	1.1262	8.7068	-3.9973	0.00010672	0.0012573	0.97591	TP63	tumor protein p63
51195	-1.1219	1.1219	9.0245	-5.9309	2.56e-08	3.35e-06	8.8089	RAPGEFL1	Rap guanine nucleotide exchange factor like 1
10753	-1.1208	1.1208	6.4047	-4.7671	4.93e-06	0.0001277	3.8439	CAPN9	calpain 9
27065	-1.0984	1.0984	8.2632	-3.1925	0.001769	0.010516	-1.595	NSG1	neuronal vesicle trafficking associated 1
8869	-1.0899	1.0899	8.2314	-5.2386	6.34e-07	2.97e-05	5.7729	ST3GAL5	"ST3 beta-galactoside alpha-2,3-sialyltransferase 5"
4091	-1.0888	1.0888	8.6224	-5.3266	4.27e-07	2.28e-05	6.1459	SMAD6	SMAD family member 6
56287	-1.0835	1.0835	6.1773	-3.917	0.00014404	0.0015704	0.69859	GKN1	gastrokine 1
339766	-1.0759	1.0759	6.7906	-2.8293	0.0054056	0.024986	-2.5953	MROH2A	maestro heat like repeat family member 2A
400451	-1.0737	1.0737	9.6609	-5.0715	1.33e-06	5.12e-05	5.0754	FAM174B	family with sequence similarity 174 member B
9651	-1.0716	1.0716	7.1399	-5.8683	3.45e-08	4.05e-06	8.5254	PLCH2	phospholipase C eta 2
80307	-1.0707	1.0707	8.6332	-5.5197	1.77e-07	1.24e-05	6.9782	FER1L4	fer-1 like family member 4 (pseudogene)
130497	-1.0647	1.0647	8.4477	-3.5703	0.00050033	0.0040114	-0.44661	OSR1	odd-skipped related transcription factor 1
90853	-1.0583	1.0583	8.1842	-3.7099	0.00030601	0.0027601	0.0042757	SPOCD1	SPOC domain containing 1
1580	-1.035	1.035	8.8852	-3.929	0.00013775	0.0015203	0.73985	CYP4B1	cytochrome P450 family 4 subfamily B member 1
3215	-1.0287	1.0287	8.843	-3.865	0.0001745	0.0018082	0.52149	HOXB5	homeobox B5
84795	-1.026	1.026	7.0995	-6.8729	2.35e-10	1.36e-07	13.263	PYROXD2	pyridine nucleotide-disulphide oxidoreductase domain 2
4128	-1.0256	1.0256	11.145	-5.5974	1.23e-07	9.77e-06	7.3184	MAOA	monoamine oxidase A
2122	-1.0198	1.0198	10.241	-5.4003	3.06e-07	1.81e-05	6.4615	MECOM	MDS1 and EVI1 complex locus
388610	-1.0106	1.0106	7.7349	-4.0468	8.85e-05	0.001087	1.1488	TRNP1	TMF1 regulated nuclear protein 1
3960	-1.01	1.01	7.1645	-2.9111	0.0042388	0.020661	-2.3791	LGALS4	galectin 4
54097	-1.0021	1.0021	7.3552	-5.8696	3.43e-08	4.05e-06	8.5312	FAM3B	FAM3 metabolism regulating signaling molecule B
301	1.0078	1.0078	10.203	3.977	0.0001152	0.001326	0.90514	ANXA1	annexin A1
10437	1.0156	1.0156	6.8473	6.4221	2.31e-09	7.29e-07	11.09	IFI30	IFI30 lysosomal thiol reductase
3992	1.0204	1.0204	7.0482	5.7302	6.63e-08	6.18e-06	7.906	FADS1	fatty acid desaturase 1
3575	1.021	1.021	6.2876	5.7852	5.12e-08	5.17e-06	8.1519	IL7R	interleukin 7 receptor
5552	1.0248	1.0248	9.0881	4.5335	1.3e-05	0.00025706	2.9346	SRGN	serglycin
94240	1.0279	1.0279	8.6423	4.5622	1.16e-05	0.00023522	3.0449	EPSTI1	epithelial stromal interaction 1
3109	1.0362	1.0362	9.4343	4.6727	7.32e-06	0.00017165	3.4727	HLA-DMB	"major histocompatibility complex, class II, DM beta"
4501	1.0429	1.0429	8.2006	4.4609	1.75e-05	0.00031742	2.6587	MT1X	metallothionein 1X
6352	1.0474	1.0474	8.1177	4.3651	2.57e-05	0.0004251	2.2998	CCL5	C-C motif chemokine ligand 5
1634	1.0479	1.0479	8.3166	4.7335	5.68e-06	0.00014317	3.7109	DCN	decorin
401845	1.0499	1.0499	6.2312	4.0936	7.41e-05	0.00095107	1.3138	401845	NA
64151	1.0514	1.0514	7.4346	6.3249	3.75e-09	9.48e-07	10.632	NCAPG	non-SMC condensin I complex subunit G
5328	1.0525	1.0525	8.7125	4.6073	9.6e-06	0.00020683	3.2183	PLAU	"plasminogen activator, urokinase"
115362	1.0548	1.0548	6.2293	5.4971	1.96e-07	1.34e-05	6.8801	GBP5	guanylate binding protein 5
1809	1.057	1.057	8.6091	5.0192	1.67e-06	6.03e-05	4.8604	DPYSL3	dihydropyrimidinase like 3
3512	1.0593	1.0593	7.7353	2.8736	0.0047415	0.022474	-2.4789	JCHAIN	joining chain of multimeric IgA and IgM
51363	1.0633	1.0633	6.5196	6.9751	1.39e-10	9.99e-08	13.765	CHST15	carbohydrate sulfotransferase 15
5997	1.0683	1.0683	8.7163	5.1731	8.49e-07	3.76e-05	5.4975	RGS2	regulator of G protein signaling 2
9056	1.0709	1.0709	7.174	6.341	3.46e-09	9.19e-07	10.707	SLC7A7	solute carrier family 7 member 7
714	1.0756	1.0756	8.2815	5.417	2.83e-07	1.72e-05	6.5334	C1QC	complement C1q C chain
10797	1.0779	1.0779	7.8923	7.1148	6.72e-11	7.1e-08	14.457	MTHFD2	"methylenetetrahydrofolate dehydrogenase (NADP+ dependent) 2, methenyltetrahydrofolate cyclohydrolase"
5947	1.0809	1.0809	7.414	5.1119	1.11e-06	4.58e-05	5.2426	RBP1	retinol binding protein 1
3113	1.0811	1.0811	9.8115	3.9277	0.00013842	0.0015248	0.73538	HLA-DPA1	"major histocompatibility complex, class II, DP alpha 1"
4071	1.0824	1.0824	10.541	4.1263	6.54e-05	0.00086685	1.4302	TM4SF1	transmembrane 4 L six family member 1
3620	1.0863	1.0863	6.0407	4.9379	2.38e-06	7.89e-05	4.5284	IDO1	"indoleamine 2,3-dioxygenase 1"
55013	1.0871	1.0871	8.6557	5.575	1.37e-07	1.07e-05	7.2198	MCUB	mitochondrial calcium uniporter dominant negative subunit beta
8140	1.0885	1.0885	8.8452	5.3612	3.65e-07	2.02e-05	6.2936	SLC7A5	solute carrier family 7 member 5
10381	1.0943	1.0943	7.8692	4.7495	5.31e-06	0.0001356	3.7743	TUBB3	tubulin beta 3 class III
10631	1.1028	1.1028	5.8978	5.8927	3.07e-08	3.91e-06	8.636	POSTN	periostin
10643	1.1039	1.1039	6.2506	4.8907	2.91e-06	9.11e-05	4.3378	IGF2BP3	insulin like growth factor 2 mRNA binding protein 3
6696	1.1114	1.1114	8.3908	3.7769	0.00024052	0.0022913	0.22576	SPP1	secreted phosphoprotein 1
9568	1.1171	1.1171	6.2265	3.7081	0.00030794	0.0027719	-0.0014925	GABBR2	gamma-aminobutyric acid type B receptor subunit 2
8910	1.1329	1.1329	7.5391	5.6525	9.55e-08	7.87e-06	7.5612	SGCE	sarcoglycan epsilon
26227	1.1341	1.1341	10.265	4.4285	1.99e-05	0.00034704	2.5366	PHGDH	phosphoglycerate dehydrogenase
1515	1.1347	1.1347	6.6722	5.0571	1.42e-06	5.31e-05	5.0159	CTSV	cathepsin V
84868	1.1448	1.1448	7.5375	6.3482	3.34e-09	9.09e-07	10.741	HAVCR2	hepatitis A virus cellular receptor 2
7805	1.1468	1.1468	7.5145	6.6057	9.2e-10	3.84e-07	11.967	LAPTM5	lysosomal protein transmembrane 5
5341	1.1475	1.1475	7.4179	5.208	7.27e-07	3.31e-05	5.644	PLEK	pleckstrin
152007	1.1552	1.1552	7.8956	6.4827	1.71e-09	5.68e-07	11.378	GLIPR2	GLI pathogenesis related 2
2207	1.1571	1.1571	7.6622	5.4494	2.44e-07	1.56e-05	6.6733	FCER1G	Fc fragment of IgE receptor Ig
3956	1.158	1.158	10.637	5.8717	3.39e-08	4.05e-06	8.5408	LGALS1	galectin 1
23531	1.1639	1.1639	7.2389	7.8065	1.7e-12	4.38e-09	17.958	MMD	monocyte to macrophage differentiation associated
929	1.1656	1.1656	9.0388	6.5638	1.14e-09	4.23e-07	11.766	CD14	CD14 molecule
241	1.1718	1.1718	8.6086	4.9713	2.06e-06	7.01e-05	4.6644	ALOX5AP	arachidonate 5-lipoxygenase activating protein
3689	1.174	1.174	8.8426	5.3675	3.55e-07	2e-05	6.3206	ITGB2	integrin subunit beta 2
3122	1.1809	1.1809	11.028	4.2019	4.88e-05	0.00069566	1.7013	HLA-DRA	"major histocompatibility complex, class II, DR alpha"
3117	1.1858	1.1858	8.6661	3.8282	0.00019965	0.0019968	0.39734	HLA-DQA1	"major histocompatibility complex, class II, DQ alpha 1"
26585	1.1873	1.1873	5.723	8.2016	1.98e-13	1.19e-09	20.008	GREM1	"gremlin 1, DAN family BMP antagonist"
7058	1.1911	1.1911	7.9486	4.0904	7.5e-05	0.00095783	1.3026	THBS2	thrombospondin 2
6515	1.1948	1.1948	9.195	6.5014	1.56e-09	5.59e-07	11.467	SLC2A3	solute carrier family 2 member 3
6355	1.1953	1.1953	7.2081	5.1566	9.13e-07	3.97e-05	5.4287	CCL8	C-C motif chemokine ligand 8
991	1.197	1.197	9.5113	5.0282	1.61e-06	5.85e-05	4.8969	CDC20	cell division cycle 20
5920	1.1991	1.1991	8.7782	3.8941	0.00015675	0.0016714	0.6205	PLAAT4	phospholipase A and acyltransferase 4
11145	1.2044	1.2044	8.5935	4.5742	1.1e-05	0.00022863	3.0907	PLAAT3	phospholipase A and acyltransferase 3
652102	1.2111	1.2111	6.1742	4.8268	3.83e-06	0.00011011	4.0813	652102	NA
713	1.2154	1.2154	8.6083	5.4563	2.37e-07	1.54e-05	6.7032	C1QB	complement C1q B chain
7045	1.2199	1.2199	9.6332	6.1705	8.01e-09	1.53e-06	9.91	TGFBI	transforming growth factor beta induced
4314	1.2221	1.2221	6.3393	5.1668	8.73e-07	3.84e-05	5.4712	MMP3	matrix metallopeptidase 3
3488	1.2291	1.2291	9.5974	3.5592	0.00052003	0.004128	-0.48194	IGFBP5	insulin like growth factor binding protein 5
1291	1.238	1.238	7.776	5.9033	2.92e-08	3.75e-06	8.6838	COL6A1	collagen type VI alpha 1 chain
7305	1.2497	1.2497	8.5203	5.6543	9.47e-08	7.87e-06	7.5689	TYROBP	transmembrane immune signaling adaptor TYROBP
3002	1.2536	1.2536	6.5092	5.8467	3.82e-08	4.28e-06	8.428	GZMB	granzyme B
1290	1.2582	1.2582	8.5767	7.0737	8.33e-11	8.31e-08	14.252	COL5A2	collagen type V alpha 2 chain
1289	1.2781	1.2781	8.4702	7.0291	1.05e-10	9.14e-08	14.032	COL5A1	collagen type V alpha 1 chain
6347	1.2935	1.2935	8.3067	5.7274	6.72e-08	6.18e-06	7.8936	CCL2	C-C motif chemokine ligand 2
113130	1.2996	1.2996	8.2963	6.771	3.97e-10	1.98e-07	12.766	CDCA5	cell division cycle associated 5
1513	1.3054	1.3054	7.7593	7.0115	1.15e-10	9.14e-08	13.945	CTSK	cathepsin K
6280	1.3055	1.3055	10.999	3.0944	0.0024144	0.01337	-1.8753	S100A9	S100 calcium binding protein A9
4283	1.3076	1.3076	6.6222	4.4672	1.7e-05	0.00031133	2.6829	CXCL9	C-X-C motif chemokine ligand 9
3936	1.3122	1.3122	9.8129	5.7457	6.17e-08	5.96e-06	7.9749	LCP1	lymphocyte cytosolic protein 1
1293	1.3141	1.3141	9.1296	6.5838	1.03e-09	4.06e-07	11.862	COL6A3	collagen type VI alpha 3 chain
1281	1.3216	1.3216	10.061	6.7955	3.5e-10	1.8e-07	12.885	COL3A1	collagen type III alpha 1 chain
165	1.3236	1.3236	6.8933	7.3176	2.32e-11	3.47e-08	15.47	AEBP1	AE binding protein 1
25907	1.3258	1.3258	8.0118	6.0463	1.47e-08	2.25e-06	9.3363	TMEM158	transmembrane protein 158 (gene/pseudogene)
3627	1.3325	1.3325	7.5259	4.3851	2.37e-05	0.00039821	2.3741	CXCL10	C-X-C motif chemokine ligand 10
4060	1.3403	1.3403	8.3229	5.8874	3.15e-08	3.96e-06	8.612	LUM	lumican
4495	1.3461	1.3461	6.55	6.0481	1.45e-08	2.25e-06	9.3444	MT1G	metallothionein 1G
5270	1.3516	1.3516	7.9522	4.8868	2.96e-06	9.17e-05	4.3218	SERPINE2	serpin family E member 2
387882	1.3729	1.3729	7.0418	5.8541	3.69e-08	4.25e-06	8.4612	C12orf75	chromosome 12 open reading frame 75
348	1.3862	1.3862	8.6408	5.5137	1.82e-07	1.26e-05	6.9522	APOE	apolipoprotein E
4489	1.394	1.394	9.1472	6.2732	4.84e-09	1.13e-06	10.389	MT1A	metallothionein 1A
5730	1.3974	1.3974	6.8085	5.0216	1.65e-06	6e-05	4.8698	PTGDS	prostaglandin D2 synthase
1278	1.4051	1.4051	9.9982	7.3661	1.79e-11	2.93e-08	15.715	COL1A2	collagen type I alpha 2 chain
3576	1.4451	1.4451	9.3948	3.8679	0.00017268	0.0017944	0.53118	CXCL8	C-X-C motif chemokine ligand 8
72	1.4572	1.4572	8.909	5.0656	1.36e-06	5.22e-05	5.0509	ACTG2	"actin gamma 2, smooth muscle"
4320	1.4892	1.4892	6.574	6.8761	2.32e-10	1.36e-07	13.279	MMP11	matrix metallopeptidase 11
651751	1.5253	1.5253	7.1974	4.2646	3.82e-05	0.00057504	1.9292	651751	NA
1462	1.5432	1.5432	7.9971	7.2871	2.72e-11	3.76e-08	15.317	VCAN	versican
4318	1.5526	1.5526	6.9907	5.7275	6.72e-08	6.18e-06	7.8938	MMP9	matrix metallopeptidase 9
115908	1.5757	1.5757	7.7374	7.4895	9.33e-12	2.09e-08	16.338	CTHRC1	collagen triple helix repeat containing 1
1277	1.662	1.662	9.8267	8.0984	3.49e-13	1.54e-09	19.47	COL1A1	collagen type I alpha 1 chain
23213	1.7072	1.7072	6.6208	8.5817	2.44e-14	4.38e-10	22.008	SULF1	sulfatase 1
649923	1.7186	1.7186	7.5556	4.3053	3.25e-05	0.00050275	2.0787	649923	NA
4502	1.7273	1.7273	8.7945	7.1818	4.74e-11	5.67e-08	14.79	MT2A	metallothionein 2A
647450	2.0339	2.0339	8.9706	4.2105	4.72e-05	0.00067793	1.7327	647450	NA
6279	2.0887	2.0887	9.5029	4.4021	2.21e-05	0.00038019	2.4376	S100A8	S100 calcium binding protein A8
642113	2.1141	2.1141	9.1347	4.4004	2.23e-05	0.00038116	2.4313	642113	NA
652493	2.1425	2.1425	9.2498	4.2541	3.98e-05	0.00059191	1.8912	652493	NA
652694	2.2052	2.2052	8.4562	4.8281	3.8e-06	0.0001097	4.0865	652694	NA

## Sheet: GSE32894
EntrezID	logFC	abslogFC	AveExpr	t	P.Value	adj.P.Val	B	Symbols	Name
6279	2.036	2.036	-0.048529	6.892	3.12e-11	1.4e-09	15.112	S100A8	S100 calcium binding protein A8
3576	1.6752	1.6752	-0.0004085	6.7902	5.78e-11	2.35e-09	14.516	CXCL8	C-X-C motif chemokine ligand 8
4502	1.6677	1.6677	-0.066176	9.0709	1.43e-17	1.17e-14	29.261	MT2A	metallothionein 2A
115908	1.5703	1.5703	0.087712	10.561	1.88e-22	8.21e-19	40.195	CTHRC1	collagen triple helix repeat containing 1
4320	1.5108	1.5108	0.1251	10.198	3.14e-21	8.23e-18	37.455	MMP11	matrix metallopeptidase 11
1277	1.4294	1.4294	0.049216	9.2047	5.41e-18	5.06e-15	30.207	COL1A1	collagen type I alpha 1 chain
23213	1.4156	1.4156	-0.052222	9.7845	7.31e-20	1.37e-16	34.392	SULF1	sulfatase 1
6696	1.3904	1.3904	0.15046	7.1506	6.32e-12	3.96e-10	16.653	SPP1	secreted phosphoprotein 1
1290	1.3339	1.3339	0.033268	9.2871	2.96e-18	2.98e-15	30.793	COL5A2	collagen type V alpha 2 chain
3627	1.3187	1.3187	0.016601	6.6331	1.48e-10	5.14e-09	13.61	CXCL10	C-X-C motif chemokine ligand 10
3853	1.3155	1.3155	0.17235	4.1808	3.79e-05	0.00020853	1.7163	KRT6A	keratin 6A
6280	1.3037	1.3037	0.050163	5.0552	7.39e-07	7.09e-06	5.4398	S100A9	S100 calcium binding protein A9
1462	1.2852	1.2852	-0.060556	8.3959	1.71e-15	4.97e-13	24.614	VCAN	versican
1293	1.2849	1.2849	-0.057712	8.4942	8.64e-16	2.98e-13	25.277	COL6A3	collagen type VI alpha 3 chain
4318	1.2795	1.2795	0.055915	6.9163	2.69e-11	1.26e-09	15.255	MMP9	matrix metallopeptidase 9
1278	1.27	1.27	-0.011977	8.2434	4.89e-15	1.16e-12	23.595	COL1A2	collagen type I alpha 2 chain
25907	1.24	1.24	-0.018987	8.2348	5.19e-15	1.18e-12	23.537	TMEM158	transmembrane protein 158 (gene/pseudogene)
1289	1.2306	1.2306	-0.041503	8.865	6.3e-17	4.12e-14	27.821	COL5A1	collagen type V alpha 1 chain
5266	1.2188	1.2188	0.15784	4.2864	2.43e-05	0.00014351	2.1331	PI3	peptidase inhibitor 3
4495	1.2082	1.2082	0.029673	7.9877	2.77e-14	4.65e-12	21.912	MT1G	metallothionein 1G
414062	1.201	1.201	0.0044771	7.1243	7.45e-12	4.41e-10	16.495	CCL3L3	C-C motif chemokine ligand 3 like 3
10631	1.1811	1.1811	-0.025605	8.3095	3.11e-15	8.29e-13	24.035	POSTN	periostin
1281	1.1616	1.1616	0.0071569	8.0354	2.01e-14	3.47e-12	22.223	COL3A1	collagen type III alpha 1 chain
348	1.1483	1.1483	0.013366	7.1288	7.24e-12	4.35e-10	16.522	APOE	apolipoprotein E
10381	1.1341	1.1341	0.20899	7.7358	1.48e-13	1.7e-11	20.289	TUBB3	tubulin beta 3 class III
3002	1.1269	1.1269	-0.021536	7.4029	1.28e-12	9.76e-11	18.196	GZMB	granzyme B
23531	1.1231	1.1231	-0.063529	10.62	1.18e-22	8.21e-19	40.648	MMD	monocyte to macrophage differentiation associated
4501	1.1136	1.1136	-0.019608	6.733	8.14e-11	3.17e-09	14.184	MT1X	metallothionein 1X
7130	1.1023	1.1023	-0.067059	8.7191	1.78e-16	8.31e-14	26.812	TNFAIP6	TNF alpha induced protein 6
4283	1.0957	1.0957	-0.034477	6.1626	2.24e-09	5.1e-08	10.992	CXCL9	C-X-C motif chemokine ligand 9
4314	1.0794	1.0794	0.07585	7.4566	9.09e-13	7.17e-11	18.53	MMP3	matrix metallopeptidase 3
51363	1.0734	1.0734	-0.063007	8.8158	8.95e-17	5.32e-14	27.48	CHST15	carbohydrate sulfotransferase 15
113146	1.0621	1.0621	-0.056634	6.2688	1.23e-09	3.09e-08	11.57	AHNAK2	AHNAK nucleoprotein 2
84868	1.0576	1.0576	-0.064314	8.5322	6.63e-16	2.48e-13	25.535	HAVCR2	hepatitis A virus cellular receptor 2
649923	1.0513	1.0513	-0.053105	3.8924	0.00012171	0.00056628	0.62541	649923	NA
2207	1.0463	1.0463	-0.060523	7.5104	6.43e-13	5.57e-11	18.865	FCER1G	Fc fragment of IgE receptor Ig
9941	1.0374	1.0374	-0.049935	9.1906	5.99e-18	5.23e-15	30.107	EXOG	exo/endonuclease G
994	1.0355	1.0355	0.022059	9.5437	4.44e-19	5.29e-16	32.637	CDC25B	cell division cycle 25B
26585	1.0343	1.0343	-0.023987	8.8776	5.76e-17	3.96e-14	27.908	GREM1	"gremlin 1, DAN family BMP antagonist"
10630	1.0329	1.0329	-0.0034967	7.8468	7.1e-14	9.58e-12	20.999	PDPN	podoplanin
7058	1.0253	1.0253	-0.059412	5.1055	5.79e-07	5.76e-06	5.6722	THBS2	thrombospondin 2
713	1.019	1.019	-0.055425	6.6453	1.37e-10	4.85e-09	13.68	C1QB	complement C1q B chain
9560	1.0189	1.0189	-0.023595	7.0674	1.06e-11	5.83e-10	16.153	CCL4L2	C-C motif chemokine ligand 4 like 2
7305	1.0076	1.0076	-0.052974	6.8606	3.77e-11	1.62e-09	14.928	TYROBP	transmembrane immune signaling adaptor TYROBP
5270	1.0031	1.0031	-0.056405	5.2508	2.83e-07	3.12e-06	6.3549	SERPINE2	serpin family E member 2
9332	1.0009	1.0009	-0.063137	8.1827	7.4e-15	1.62e-12	23.192	CD163	CD163 molecule
3553	1.0009	1.0009	0.031699	5.5903	5e-08	7.18e-07	8.0114	IL1B	interleukin 1 beta
8869	-1.0006	1.0006	-0.038758	-7.6088	3.4e-13	3.29e-11	19.483	ST3GAL5	"ST3 beta-galactoside alpha-2,3-sialyltransferase 5"
4477	-1.0017	1.0017	0.078595	-4.6951	4.02e-06	3.04e-05	3.8325	MSMB	microseminoprotein beta
3397	-1.0022	1.0022	0.047958	-7.6383	2.8e-13	2.87e-11	19.669	ID1	"inhibitor of DNA binding 1, HLH protein"
635	-1.0088	1.0088	0.077026	-3.5882	0.00038719	0.0015213	-0.44854	BHMT	betaine--homocysteine S-methyltransferase
80117	-1.0159	1.0159	0.047157	-6.0144	5.11e-09	1.03e-07	10.198	ARL14	ADP ribosylation factor like GTPase 14
5816	-1.0205	1.0205	-0.06451	-4.5945	6.34e-06	4.49e-05	3.4015	PVALB	parvalbumin
10840	-1.0233	1.0233	-0.057451	-5.2518	2.82e-07	3.11e-06	6.3596	ALDH1L1	aldehyde dehydrogenase 1 family member L1
147798	-1.0253	1.0253	0.040915	-10.578	1.64e-22	8.21e-19	40.33	TMC4	transmembrane channel like 4
124975	-1.0289	1.0289	0.030392	-8.3822	1.88e-15	5.35e-13	24.522	GGT6	gamma-glutamyltransferase 6
54097	-1.0379	1.0379	-0.025196	-9.6913	1.47e-19	2.14e-16	33.71	FAM3B	FAM3 metabolism regulating signaling molecule B
7832	-1.046	1.046	-0.071373	-7.8425	7.3e-14	9.66e-12	20.972	BTG2	BTG anti-proliferation factor 2
10974	-1.0487	1.0487	0.018562	-7.6386	2.8e-13	2.87e-11	19.671	ADIRF	adipogenesis regulatory factor
56287	-1.0585	1.0585	0.016373	-5.5161	7.35e-08	9.86e-07	7.642	GKN1	gastrokine 1
127845	-1.0646	1.0646	0.014869	-7.5713	4.33e-13	3.97e-11	19.247	GOLT1A	golgi transport 1A
2624	-1.072	1.072	9.8e-05	-8.0889	1.4e-14	2.51e-12	22.574	GATA2	GATA binding protein 2
3294	-1.0938	1.0938	0.039837	-5.7379	2.29e-08	3.73e-07	8.7578	HSD17B2	hydroxysteroid 17-beta dehydrogenase 2
27065	-1.1014	1.1014	-0.03549	-5.3607	1.63e-07	1.95e-06	6.8817	NSG1	neuronal vesicle trafficking associated 1
3399	-1.1183	1.1183	0.010784	-9.0204	2.06e-17	1.59e-14	28.906	ID3	"inhibitor of DNA binding 3, HLH protein"
5507	-1.1185	1.1185	-0.016438	-6.3232	9e-10	2.42e-08	11.869	PPP1R3C	protein phosphatase 1 regulatory subunit 3C
27324	-1.1364	1.1364	0.1358	-8.1185	1.15e-14	2.24e-12	22.769	TOX3	TOX high mobility group box family member 3
2172	-1.1376	1.1376	0.12456	-7.1847	5.11e-12	3.28e-10	16.86	FABP6	fatty acid binding protein 6
130497	-1.1403	1.1403	-0.058235	-6.2357	1.48e-09	3.6e-08	11.389	OSR1	odd-skipped related transcription factor 1
1573	-1.1589	1.1589	0.095882	-7.1975	4.71e-12	3.1e-10	16.938	CYP2J2	cytochrome P450 family 2 subfamily J member 2
126410	-1.1942	1.1942	0.044706	-6.6393	1.42e-10	4.98e-09	13.645	CYP4F22	cytochrome P450 family 4 subfamily F member 22
4091	-1.2015	1.2015	0.057222	-8.1433	9.68e-15	1.95e-12	22.932	SMAD6	SMAD family member 6
6623	-1.2173	1.2173	0.072647	-7.5995	3.61e-13	3.42e-11	19.424	SNCG	synuclein gamma
66002	-1.2205	1.2205	-0.015588	-7.3415	1.9e-12	1.36e-10	17.817	CYP4F12	cytochrome P450 family 4 subfamily F member 12
2877	-1.2269	1.2269	0.022745	-5.7685	1.95e-08	3.22e-07	8.9148	GPX2	glutathione peroxidase 2
1580	-1.2444	1.2444	0.053399	-7.4519	9.37e-13	7.3e-11	18.5	CYP4B1	cytochrome P450 family 4 subfamily B member 1
116123	-1.2477	1.2477	0.11333	-5.192	3.79e-07	3.99e-06	6.0767	FMO9P	"flavin containing dimethylaniline monoxygenase 9, pseudogene"
400451	-1.2527	1.2527	-0.0099346	-8.5331	6.58e-16	2.48e-13	25.541	FAM174B	family with sequence similarity 174 member B
5320	-1.2555	1.2555	0.065131	-4.9228	1.39e-06	1.22e-05	4.837	PLA2G2A	phospholipase A2 group IIA
644844	-1.281	1.281	0.10899	-5.9014	9.5e-09	1.77e-07	9.6027	PHGR1	"proline, histidine and glycine rich 1"
169166	-1.2908	1.2908	0.034967	-6.8906	3.14e-11	1.4e-09	15.104	SNX31	sorting nexin 31
1510	-1.292	1.292	-0.024346	-6.3563	7.44e-10	2.07e-08	12.052	CTSE	cathepsin E
139728	-1.314	1.314	0.09317	-5.2707	2.56e-07	2.86e-06	6.4497	PNCK	pregnancy up-regulated nonubiquitous CaM kinase
8537	-1.3717	1.3717	0.03451	-8.7539	1.39e-16	6.74e-14	27.052	BCAS1	breast carcinoma amplified sequence 1
7379	-1.3848	1.3848	0.12373	-6.3613	7.23e-10	2.01e-08	12.079	UPK2	uroplakin 2
54997	-1.4851	1.4851	-0.009085	-7.1249	7.42e-12	4.41e-10	16.499	TESC	tescalcin
3248	-1.5944	1.5944	0.066732	-7.9121	4.6e-14	6.91e-12	21.421	HPGD	15-hydroxyprostaglandin dehydrogenase
8000	-1.6668	1.6668	0.11108	-6.9534	2.14e-11	1.05e-09	15.474	PSCA	prostate stem cell antigen
387695	-1.6701	1.6701	0.01817	-7.3605	1.68e-12	1.22e-10	17.935	C10orf99	chromosome 10 open reading frame 99
11199	-1.7053	1.7053	-0.010327	-5.2682	2.59e-07	2.9e-06	6.4377	ANXA10	annexin A10
10202	-1.7132	1.7132	0.0012908	-8.1742	7.85e-15	1.68e-12	23.136	DHRS2	dehydrogenase/reductase 2
22802	-1.7363	1.7363	0.056373	-6.6318	1.49e-10	5.17e-09	13.603	CLCA4	chloride channel accessory 4
23584	-1.8341	1.8341	0.041471	-10.384	7.47e-22	2.44e-18	38.854	VSIG2	V-set and immunoglobulin domain containing 2
6690	-1.9204	1.9204	0.048399	-7.1948	4.79e-12	3.12e-10	16.921	SPINK1	serine peptidase inhibitor Kazal type 1
118663	-2.0615	2.0615	0.04098	-8.4355	1.3e-15	4.15e-13	24.881	BTBD16	BTB domain containing 16
3158	-2.1858	2.1858	0.015065	-8.2781	3.85e-15	9.7e-13	23.826	HMGCS2	3-hydroxy-3-methylglutaryl-CoA synthase 2
55118	-2.2801	2.2801	-0.041732	-7.6479	2.63e-13	2.73e-11	19.73	CRTAC1	cartilage acidic protein 1

## Sheet: GSE48075
Identification of Prognostic Biomarkers of Potential Hub Genes in Urothelial Carcinoma and Function in Microenvironment Wei Chu, Bing Zhang, Haifeng Gong, Qianqian Zhao, Jun Chen and Hong Ji*
EntrezID	logFC	ABSLOGFC	AveExpr	t	P.Value	adj.P.Val	B	Symbols
3853	2.355	2.355	8.9218	4.855	3.14e-06	7.39e-05	4.2281	KRT6A
6279	2.2741	2.2741	10.508	5.7922	4.29e-08	2.62e-06	8.2972	S100A8
4502	2.2447	2.2447	9.9365	7.9813	4.42e-13	1.01e-09	19.283	MT2A
115908	2.0314	2.0314	8.4793	9.1115	6.93e-16	1.36e-11	25.479	CTHRC1
1277	1.9968	1.9968	11.089	7.9025	6.86e-13	1.22e-09	18.861	COL1A1
23213	1.9643	1.9643	7.981	8.7523	5.54e-15	5.43e-11	23.484	SULF1
1278	1.8679	1.8679	11.116	7.7784	1.37e-12	2.06e-09	18.199	COL1A2
642113	1.7935	1.7935	9.5039	4.2455	3.92e-05	0.00053161	1.8561	642113
5266	1.7656	1.7656	8.2355	3.9501	0.00012257	0.0012964	0.79438	PI3
652493	1.7564	1.7564	9.6119	4.0409	8.69e-05	0.00099801	1.1142	652493
6423	1.7476	1.7476	7.282	5.9435	2.06e-08	1.47e-06	8.9961	SFRP2
4489	1.726	1.726	10.102	7.1263	4.77e-11	1.99e-08	14.794	MT1A
647450	1.7059	1.7059	9.3044	4.1064	6.75e-05	0.00082243	1.3488	647450
1281	1.6997	1.6997	11.269	7.1722	3.73e-11	1.76e-08	15.029	COL3A1
1293	1.6995	1.6995	10.427	7.0507	7.14e-11	2.64e-08	14.408	COL6A3
3861	1.6545	1.6545	7.3951	4.4121	2.01e-05	0.00031487	2.4809	KRT14
4320	1.6506	1.6506	8.2377	6.6417	6.12e-10	1.14e-07	12.353	MMP11
652694	1.635	1.635	8.6525	4.221	4.32e-05	0.00057074	1.7658	652694
4501	1.6327	1.6327	9.4185	6.505	1.24e-09	1.91e-07	11.68	MT1X
6280	1.6039	1.6039	11.693	4.3305	2.79e-05	0.00040917	2.1727	S100A9
3576	1.6008	1.6008	8.86	5.1123	1.01e-06	3.1e-05	5.2976	CXCL8
7045	1.5659	1.5659	10.889	7.384	1.19e-11	9.33e-09	16.125	TGFBI
72	1.5389	1.5389	10.599	4.4495	1.73e-05	0.00028161	2.6238	ACTG2
4318	1.5153	1.5153	8.2419	5.3625	3.25e-07	1.3e-05	6.3731	MMP9
5270	1.5085	1.5085	9.5635	5.265	5.07e-07	1.81e-05	5.9501	SERPINE2
1289	1.5008	1.5008	9.4227	6.7259	3.95e-10	8.61e-08	12.771	COL5A1
165	1.4946	1.4946	8.5063	6.4086	2.02e-09	2.68e-07	11.21	AEBP1
286887	1.4727	1.4727	7.1661	3.8803	0.00015911	0.0015919	0.55238	KRT6C
301	1.4703	1.4703	11.489	6.4128	1.98e-09	2.65e-07	11.23	ANXA1
1290	1.4616	1.4616	9.6644	6.9469	1.24e-10	3.62e-08	13.881	COL5A2
6281	1.4557	1.4557	12.037	7.6696	2.49e-12	3.06e-09	17.623	S100A10
348	1.4534	1.4534	9.7002	5.7566	5.09e-08	2.98e-06	8.1343	APOE
728910	1.4466	1.4466	7.2051	4.5212	1.29e-05	0.0002227	2.9002	728910
1311	1.4379	1.4379	6.9873	5.9181	2.33e-08	1.62e-06	8.8781	COMP
1291	1.4237	1.4237	9.1645	5.9003	2.54e-08	1.74e-06	8.7953	COL6A1
4060	1.4086	1.4086	8.9985	6.0614	1.15e-08	9.62e-07	9.5484	LUM
5947	1.3865	1.3865	8.7383	5.6798	7.35e-08	3.97e-06	7.7848	RBP1
1830	1.3864	1.3864	6.9301	4.6012	9.22e-06	0.00017057	3.2122	DSG3
10457	1.3743	1.3743	9.0096	6.096	9.72e-09	8.47e-07	9.7112	GPNMB
649923	1.3739	1.3739	8.2328	3.8167	0.00020128	0.001905	0.33467	649923
713	1.3723	1.3723	9.2489	5.9818	1.71e-08	1.27e-06	9.1749	C1QB
7058	1.3685	1.3685	9.2718	5.074	1.2e-06	3.51e-05	5.1359	THBS2
2318	1.3677	1.3677	7.7102	5.0497	1.34e-06	3.82e-05	5.0339	FLNC
12	1.3539	1.3539	7.4995	4.2675	3.59e-05	0.00049651	1.9375	SERPINA3
2191	1.3478	1.3478	7.05	8.02	3.56e-13	1.01e-09	19.49	FAP
10631	1.3454	1.3454	7.0449	7.3328	1.57e-11	1.14e-08	15.858	POSTN
1513	1.33	1.33	8.6008	6.4724	1.46e-09	2.11e-07	11.52	CTSK
653499	1.3211	1.3211	6.9996	4.2822	3.39e-05	0.00047417	1.9923	LGALS7B
644945	1.3141	1.3141	8.3099	3.7151	0.00029122	0.0025136	-0.0066391	KRT16P3
55076	1.3076	1.3076	7.9041	5.4866	1.83e-07	8.23e-06	6.9192	TMEM45A
1634	1.296	1.296	9.0801	5.1779	7.53e-07	2.46e-05	5.5763	DCN
3491	1.2733	1.2733	8.535	6.1143	8.88e-09	7.96e-07	9.7979	CCN1
3963	1.2729	1.2729	6.9339	4.2879	3.31e-05	0.00046737	2.0134	LGALS7
8463	1.2683	1.2683	9.3461	5.8541	3.18e-08	2.04e-06	8.5818	TEAD2
714	1.2634	1.2634	9.2649	5.6663	7.83e-08	4.16e-06	7.7238	C1QC
6278	1.2574	1.2574	6.9016	3.7164	0.00028985	0.0025039	-0.0022727	S100A7
27295	1.2554	1.2554	7.6199	5.9811	1.71e-08	1.27e-06	9.1716	PDLIM3
1490	1.248	1.248	9.4675	5.4983	1.73e-07	7.89e-06	6.9712	CCN2
6347	1.2414	1.2414	8.483	5.4815	1.87e-07	8.4e-06	6.8964	CCL2
1462	1.241	1.241	8.813	5.2884	4.56e-07	1.67e-05	6.0509	VCAN
9982	1.2309	1.2309	7.1813	4.1309	6.14e-05	0.00076532	1.4372	FGFBP1
929	1.2308	1.2308	9.7725	6.5727	8.73e-10	1.5e-07	12.012	CD14
10410	1.2253	1.2253	11.523	5.9012	2.53e-08	1.73e-06	8.7998	IFITM3
1809	1.2249	1.2249	9.4952	5.2069	6.61e-07	2.23e-05	5.7003	DPYSL3
23022	1.219	1.219	9.7193	6.6024	7.5e-10	1.34e-07	12.158	PALLD
3854	1.2167	1.2167	6.8433	3.9879	0.00010627	0.0011633	0.9269	KRT6B
800	1.2141	1.2141	8.9804	6.2106	5.49e-09	5.55e-07	10.256	CALD1
5328	1.2115	1.2115	9.318	5.7168	6.16e-08	3.41e-06	7.9529	PLAU
6696	1.2091	1.2091	8.8034	4.4843	1.5e-05	0.00025043	2.7575	SPP1
25907	1.1974	1.1974	9.5106	4.7876	4.19e-06	9.33e-05	3.9548	TMEM158
810	1.1971	1.1971	7.6892	3.476	0.00067554	0.004865	-0.78026	CALML3
9941	1.1962	1.1962	7.1499	7.1552	4.09e-11	1.78e-08	14.942	EXOG
84617	1.185	1.185	7.3758	7.4625	7.76e-12	6.62e-09	16.534	TUBB6
716	1.1845	1.1845	7.9102	6.7007	4.5e-10	9.4e-08	12.645	C1S
3956	1.1842	1.1842	11.252	5.6467	8.6e-08	4.48e-06	7.6353	LGALS1
308	1.1781	1.1781	10.14	7.1142	5.09e-11	2.08e-08	14.732	ANXA5
857	1.175	1.175	8.6059	6.6211	6.8e-10	1.24e-07	12.251	CAV1
3613	1.1741	1.1741	8.6262	6.5423	1.02e-09	1.71e-07	11.863	IMPA2
6355	1.1711	1.1711	7.6992	5.0723	1.21e-06	3.52e-05	5.1288	CCL8
3488	1.1702	1.1702	10.362	3.3761	0.00094846	0.0062985	-1.0905	IGFBP5
140606	1.1693	1.1693	8.4321	6.4728	1.46e-09	2.11e-07	11.522	SELENOM
284119	1.1657	1.1657	9.973	5.8837	2.75e-08	1.84e-06	8.7186	CAVIN1
283120	1.1642	1.1642	10.829	2.5566	0.011619	0.043977	-3.3368	H19
1890	1.1499	1.1499	9.3176	6.2212	5.21e-09	5.32e-07	10.306	TYMP
2207	1.1431	1.1431	8.3982	5.3618	3.26e-07	1.3e-05	6.3703	FCER1G
51363	1.1413	1.1413	7.5851	6.4322	1.79e-09	2.46e-07	11.324	CHST15
5730	1.138	1.138	7.8992	3.9141	0.00014026	0.0014386	0.66926	PTGDS
7305	1.1358	1.1358	9.0681	5.1461	8.69e-07	2.77e-05	5.4408	TYROBP
729252	1.1334	1.1334	7.1331	3.8114	0.00020519	0.0019401	0.31685	KRT16P1
3627	1.125	1.125	8.3121	3.7749	0.00023449	0.0021477	0.19345	CXCL10
400578	1.1229	1.1229	7.3165	3.7275	0.00027845	0.0024389	0.034744	KRT16P2
1545	1.1219	1.1219	7.1699	5.497	1.74e-07	7.92e-06	6.9653	CYP1B1
3489	1.1197	1.1197	8.2527	5.1159	9.95e-07	3.07e-05	5.3128	IGFBP6
8140	1.1159	1.1159	9.5144	5.1602	8.16e-07	2.63e-05	5.5007	SLC7A5
84624	1.1143	1.1143	6.4852	6.4769	1.43e-09	2.09e-07	11.542	FNDC1
4256	1.1142	1.1142	10.189	4.1966	4.75e-05	0.00061421	1.6765	MGP
6515	1.1114	1.1114	9.2261	6.4662	1.51e-09	2.14e-07	11.49	SLC2A3
1307	1.1084	1.1084	8.0008	5.5139	1.61e-07	7.49e-06	7.0402	COL16A1
1009	1.108	1.108	8.4312	5.5553	1.32e-07	6.33e-06	7.2247	CDH11
2619	1.106	1.106	6.8896	6.5761	8.58e-10	1.49e-07	12.029	GAS1
23531	1.0974	1.0974	8.0317	7.1903	3.39e-11	1.75e-08	15.123	MMD
10643	1.0973	1.0973	7.4627	5.1899	7.13e-07	2.35e-05	5.6276	IGF2BP3
8519	1.0933	1.0933	10.184	4.8425	3.31e-06	7.73e-05	4.1772	IFITM1
3689	1.0921	1.0921	9.7311	4.9467	2.1e-06	5.5e-05	4.6049	ITGB2
5997	1.0844	1.0844	9.2853	4.878	2.84e-06	6.84e-05	4.3222	RGS2
10581	1.0768	1.0768	11.464	5.5885	1.13e-07	5.61e-06	7.3736	IFITM2
414062	1.0639	1.0639	7.3255	5.3607	3.28e-07	1.3e-05	6.3652	CCL3L3
6317	1.0599	1.0599	7.0463	3.8415	0.00018368	0.0017825	0.41933	SERPINB3
7057	1.0573	1.0573	9.0872	5.2522	5.38e-07	1.89e-05	5.8947	THBS1
8560	1.0529	1.0529	9.0156	7.012	8.77e-11	2.92e-08	14.211	DEGS1
59	1.052	1.052	12.524	4.6742	6.79e-06	0.00013445	3.5005	ACTA2
23643	1.0497	1.0497	8.7147	6.2878	3.73e-09	4.33e-07	10.626	LY96
5552	1.0467	1.0467	9.2687	4.4573	1.67e-05	0.00027528	2.6537	SRGN
3868	1.0439	1.0439	8.2407	3.4867	0.00065113	0.0047379	-0.74654	KRT16
1264	1.043	1.043	7.0963	4.1467	5.77e-05	0.00072532	1.4945	CNN1
5919	1.0386	1.0386	8.9022	4.7058	5.94e-06	0.0001212	3.6261	RARRES2
81610	1.0359	1.0359	7.9243	6.5023	1.25e-09	1.91e-07	11.667	FAM83D
9332	1.0299	1.0299	7.552	5.3102	4.13e-07	1.55e-05	6.1456	CD163
54626	1.0294	1.0294	6.878	5.6486	8.52e-08	4.46e-06	7.6438	HES2
4973	1.0293	1.0293	7.7596	4.5925	9.56e-06	0.00017546	3.178	OLR1
26585	1.0283	1.0283	6.7704	6.3212	3.15e-09	3.84e-07	10.787	GREM1
241	1.0258	1.0258	8.9515	4.6912	6.32e-06	0.00012762	3.5678	ALOX5AP
7431	1.0242	1.0242	11.038	5.2008	6.79e-07	2.28e-05	5.6739	VIM
55959	1.0222	1.0222	7.3234	7.0083	8.95e-11	2.92e-08	14.192	SULF2
9056	1.0196	1.0196	8.0196	5.9527	1.97e-08	1.41e-06	9.0388	SLC7A7
4495	1.014	1.014	7.2129	4.7174	5.66e-06	0.00011723	3.6723	MT1G
4478	1.0117	1.0117	10.031	5.4098	2.61e-07	1.1e-05	6.5802	MSN
113130	1.0084	1.0084	9.0297	5.4646	2.02e-07	8.94e-06	6.822	CDCA5
164284	1.006	1.006	6.5234	6.1719	6.66e-09	6.41e-07	10.071	APCDD1L
441019	1.0017	1.0017	6.5686	6.0677	1.12e-08	9.41e-07	9.578	441019
79961	-1.0073	1.0073	9.8699	-6.7704	3.13e-10	7.39e-08	12.993	DENND2D
642299	-1.0097	1.0097	9.3054	-6.8907	1.67e-10	4.36e-08	13.597	642299
22906	-1.0189	1.0189	9.8581	-6.7656	3.21e-10	7.41e-08	12.969	TRAK1
828	-1.0264	1.0264	8.926	-5.1116	1.01e-06	3.1e-05	5.2948	CAPS
126969	-1.0276	1.0276	9.0784	-6.1102	9.06e-09	7.97e-07	9.7787	SLC44A3
64284	-1.0298	1.0298	8.5151	-5.9788	1.73e-08	1.28e-06	9.1608	RAB17
7433	-1.0497	1.0497	9.0532	-6.1655	6.88e-09	6.52e-07	10.041	VIPR1
84433	-1.0526	1.0526	8.7693	-7.5582	4.6e-12	4.51e-09	17.035	CARD11
2952	-1.0541	1.0541	9.0337	-3.6828	0.00032701	0.0027569	-0.11352	2952
956	-1.0635	1.0635	8.1589	-5.5629	1.28e-07	6.16e-06	7.2589	ENTPD3
130497	-1.0896	1.0896	8.9454	-4.12	6.41e-05	0.00079057	1.3979	OSR1
27324	-1.0898	1.0898	7.0182	-6.2755	3.97e-09	4.52e-07	10.567	TOX3
51337	-1.0927	1.0927	10.901	-6.4928	1.32e-09	1.97e-07	11.62	THEM6
256764	-1.0934	1.0934	10.035	-3.4851	0.00065471	0.0047578	-0.75157	WDR72
57530	-1.0952	1.0952	10.12	-4.8797	2.82e-06	6.82e-05	4.3294	CGN
26996	-1.1003	1.1003	8.2004	-6.0273	1.36e-08	1.07e-06	9.3878	GPR160
6623	-1.1075	1.1075	9.3727	-4.0824	7.41e-05	0.00088107	1.2623	SNCG
201501	-1.1081	1.1081	8.2761	-6.2555	4.39e-09	4.8e-07	10.47	ZBTB7C
148170	-1.1123	1.1123	10.209	-5.3453	3.52e-07	1.37e-05	6.2982	CDC42EP5
5284	-1.1151	1.1151	7.4292	-4.2185	4.36e-05	0.00057433	1.7565	PIGR
84189	-1.1155	1.1155	7.3464	-6.4362	1.76e-09	2.43e-07	11.344	SLITRK6
5909	-1.116	1.116	9.4612	-5.1843	7.32e-07	2.39e-05	5.6036	RAP1GAP
3231	-1.1162	1.1162	7.5492	-5.3601	3.28e-07	1.3e-05	6.3629	HOXD1
6286	-1.1173	1.1173	13.458	-3.9494	0.0001229	0.0012992	0.79187	S100P
2122	-1.1258	1.1258	11.045	-5.7792	4.57e-08	2.76e-06	8.2374	MECOM
80307	-1.1335	1.1335	8.5583	-6.4175	1.93e-09	2.61e-07	11.253	FER1L4
147798	-1.136	1.136	8.1313	-7.281	2.08e-11	1.31e-08	15.59	TMC4
10551	-1.1363	1.1363	7.4232	-6.9436	1.26e-10	3.64e-08	13.864	AGR2
3855	-1.1369	1.1369	11.541	-3.4091	0.00084863	0.0057844	-0.98895	KRT7
3218	-1.1394	1.1394	7.5258	-4.5517	1.13e-05	0.00020146	3.0187	HOXB8
57556	-1.1423	1.1423	9.2623	-4.9015	2.56e-06	6.36e-05	4.4189	SEMA6A
8399	-1.1512	1.1512	8.4801	-5.0086	1.6e-06	4.37e-05	4.8621	PLA2G10
85315	-1.1521	1.1521	8.4142	-5.9039	2.5e-08	1.72e-06	8.812	PAQR8
6563	-1.1565	1.1565	7.7879	-6.5623	9.21e-10	1.56e-07	11.961	SLC14A1
4128	-1.1568	1.1568	11.402	-5.7091	6.39e-08	3.52e-06	7.9179	MAOA
169166	-1.1585	1.1585	8.9815	-3.8398	0.00018483	0.0017908	0.41357	SNX31
3215	-1.1638	1.1638	8.864	-4.7708	4.5e-06	9.8e-05	3.8869	HOXB5
55321	-1.1658	1.1658	8.0873	-6.5399	1.03e-09	1.72e-07	11.851	TMEM74B
116123	-1.1685	1.1685	8.7164	-3.3046	0.0012042	0.0075879	-1.3081	FMO9P
651957	-1.1692	1.1692	7.1296	-5.7849	4.44e-08	2.7e-06	8.2638	651957
124975	-1.171	1.171	8.5744	-6.3998	2.12e-09	2.77e-07	11.167	GGT6
7136	-1.1772	1.1772	7.7535	-4.3435	2.65e-05	0.00039303	2.2216	TNNI2
2625	-1.1824	1.1824	9.2232	-5.3856	2.92e-07	1.21e-05	6.474	GATA3
3397	-1.1894	1.1894	9.9185	-7.177	3.64e-11	1.76e-08	15.054	ID1
22998	-1.1937	1.1937	9.5039	-5.9562	1.93e-08	1.39e-06	9.0552	LIMCH1
1573	-1.1978	1.1978	10.053	-4.6091	8.92e-06	0.00016571	3.2432	CYP2J2
54097	-1.2096	1.2096	7.7088	-7.2468	2.5e-11	1.44e-08	15.413	FAM3B
7113	-1.2225	1.2225	9.1047	-4.3837	2.25e-05	0.00034465	2.3734	TMPRSS2
440482	-1.2226	1.2226	7.2065	-7.0102	8.86e-11	2.92e-08	14.202	ANKRD20A5P
644844	-1.2256	1.2256	7.633	-3.6871	0.00032207	0.0027247	-0.099503	PHGR1
644151	-1.2265	1.2265	7.5205	-5.2593	5.21e-07	1.84e-05	5.9255	644151
51702	-1.2294	1.2294	9.0689	-3.6216	0.00040667	0.0032724	-0.31431	PADI3
10840	-1.238	1.238	8.2591	-4.7838	4.26e-06	9.45e-05	3.9392	ALDH1L1
7379	-1.2511	1.2511	8.5545	-3.7431	0.00026323	0.002341	0.086653	UPK2
8869	-1.2559	1.2559	8.5923	-7.1932	3.33e-11	1.75e-08	15.138	ST3GAL5
22802	-1.2601	1.2601	8.8235	-3.5641	0.00049766	0.0038086	-0.49994	CLCA4
6653	-1.2678	1.2678	9.1004	-6.662	5.51e-10	1.1e-07	12.453	SORL1
4091	-1.28	1.28	8.3099	-7.9411	5.53e-13	1.08e-09	19.067	SMAD6
10974	-1.2811	1.2811	13.319	-5.047	1.35e-06	3.85e-05	5.0227	ADIRF
127943	-1.302	1.302	9.1104	-5.1023	1.06e-06	3.19e-05	5.2554	FCRLB
139728	-1.3037	1.3037	9.4821	-3.9029	0.00014629	0.0014818	0.63023	PNCK
150696	-1.3097	1.3097	11.007	-5.8704	2.94e-08	1.91e-06	8.6568	PROM2
66002	-1.3215	1.3215	8.6683	-5.2942	4.44e-07	1.63e-05	6.0762	CYP4F12
388610	-1.3316	1.3316	8.5973	-6.0133	1.46e-08	1.13e-06	9.3222	TRNP1
127845	-1.3358	1.3358	8.412	-6.3729	2.43e-09	3.08e-07	11.036	GOLT1A
2203	-1.3358	1.3358	10.317	-5.9538	1.96e-08	1.41e-06	9.0442	FBP1
90853	-1.3658	1.3658	7.8693	-6.5346	1.06e-09	1.73e-07	11.825	SPOCD1
3169	-1.3903	1.3903	10.975	-5.3143	4.05e-07	1.53e-05	6.1631	FOXA1
8495	-1.4022	1.4022	10.909	-8.0056	3.85e-13	1.01e-09	19.413	PPFIBP2
54997	-1.4301	1.4301	8.8644	-4.701	6.06e-06	0.00012319	3.607	TESC
1510	-1.4356	1.4356	7.3957	-5.8439	3.34e-08	2.13e-06	8.5345	CTSE
94234	-1.4476	1.4476	11.742	-5.1864	7.25e-07	2.38e-05	5.6128	FOXQ1
2172	-1.4647	1.4647	7.9199	-6.8944	1.63e-10	4.33e-08	13.616	FABP6
726	-1.4853	1.4853	8.9825	-7.6531	2.73e-12	3.15e-09	17.535	CAPN5
5507	-1.4924	1.4924	9.6813	-6.2571	4.35e-09	4.8e-07	10.478	PPP1R3C
131177	-1.4961	1.4961	7.5248	-7.2305	2.73e-11	1.49e-08	15.33	FAM3D
1917	-1.5517	1.5517	8.9365	-4.2783	3.44e-05	0.00048025	1.9779	EEF1A2
27065	-1.5965	1.5965	8.9823	-6.7122	4.24e-10	9.02e-08	12.703	NSG1
126410	-1.641	1.641	8.6594	-6.0274	1.36e-08	1.07e-06	9.3884	CYP4F22
6947	-1.6692	1.6692	8.6127	-4.301	3.14e-05	0.00044842	2.0622	TCN1
400451	-1.681	1.681	9.7294	-7.7525	1.58e-12	2.21e-09	18.062	FAM174B
1580	-1.7226	1.7226	9.0564	-6.2666	4.15e-09	4.67e-07	10.524	CYP4B1
3248	-1.727	1.727	10.294	-5.3244	3.87e-07	1.47e-05	6.2074	HPGD
8537	-1.7961	1.7961	8.6658	-6.7683	3.17e-10	7.39e-08	12.982	BCAS1
2877	-1.8056	1.8056	11.577	-5.4404	2.27e-07	9.78e-06	6.7151	GPX2
3294	-1.8716	1.8716	9.3954	-6.9185	1.44e-10	3.98e-08	13.737	HSD17B2
1577	-1.8938	1.8938	8.8699	-7.4992	6.35e-12	5.93e-09	16.726	CYP3A5
11045	-1.9165	1.9165	10.808	-4.4217	1.93e-05	0.00030549	2.5175	UPK1A
8000	-1.9729	1.9729	9.8808	-5.441	2.26e-07	9.78e-06	6.7175	PSCA
10202	-2.0736	2.0736	10.474	-5.5716	1.23e-07	6e-06	7.2977	DHRS2
387695	-2.2481	2.2481	8.984	-7.0191	8.45e-11	2.92e-08	14.247	C10orf99
23584	-2.2509	2.2509	10.642	-6.7203	4.07e-10	8.76e-08	12.743	VSIG2
118663	-2.3444	2.3444	9.5581	-6.4077	2.03e-09	2.68e-07	11.205	BTBD16
11199	-2.4996	2.4996	9.0298	-6.0501	1.22e-08	9.96e-07	9.4952	ANXA10
55118	-2.716	2.716	8.4782	-6.9843	1.02e-10	3.21e-08	14.07	CRTAC1
3158	-2.8447	2.8447	10.288	-6.8003	2.68e-10	6.57e-08	13.142	HMGCS2
6690	-3.5164	3.5164	11.923	-7.3949	1.12e-11	9.16e-09	16.181	SPINK1
